# Supplementary material for: High-frequency electrical stimulation attenuates neuronal release of inflammatory mediators and ameliorates neuropathic pain
Source: PubMed Central journal article supplement (PMC9533511; doi:10.1186/s42234-022-00098-8), 2022-10-05

# Supplementary Figure 2

A

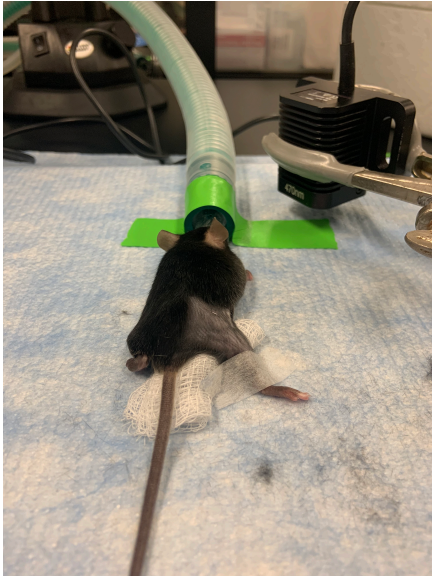

B

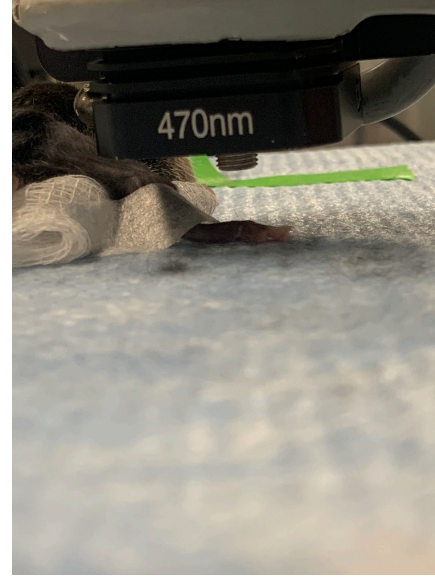

C

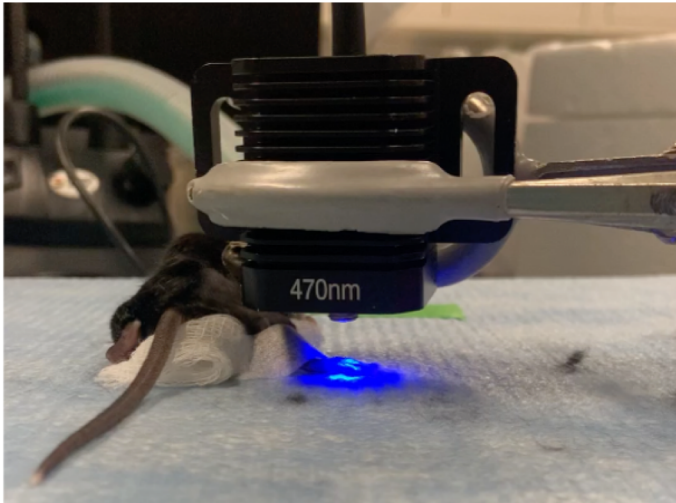

D

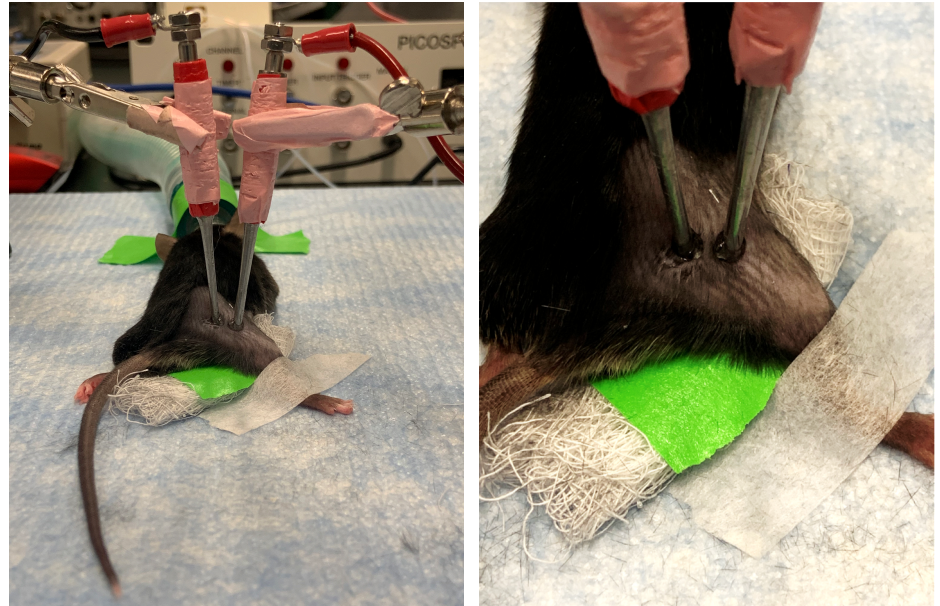

Supplement: 42234_2022_98_MOESM2_ESM.pdf [file 42234_2022_98_MOESM2_ESM.pdf]
